# Supplementary material
Source: publisher site journal article supplement (https://www.spandidos-publications.com/1917/downloadSupplementary)

Figure S1. Transfection efficiency of miR-506 mimic, KCNQ1OT1 overexpression vector and miR-506 inhibitor in sorafenib-resistant HCC cells. (A) The expression of miR-506 in SK-HEP-1/sorafenib and Huh-7/sorafenib cells transfected with miR-506 or miR-NC was determined by RT-qPCR assay. (B) The expression of KCNQ1OT1 in SK-HEP-1/sorafenib and Huh-7/sorafenib cells transfected with KCNQ1OT1 or pcDNA was determined by RT-qPCR assay. (C) The expression of miR-506 in SK-HEP-1/sorafenib and Huh-7/sorafenib cells transfected with anti-miR-506 or anti-NC was determined by RT-qPCR assay. (D) The expression of KCNQ1OT1 in SK-HEP-1/sorafenib and Huh-7/sorafenib cells transfected with miR-506 or miR-NC was determined by RT-qPCR assay. \* $P < 0.05$ . HCC, hepatocellular carcinoma; KCNQ1OT1, KCNQ1 overlapping transcript 1; RT-qPCR, reverse transcription-quantitative PCR analysis.

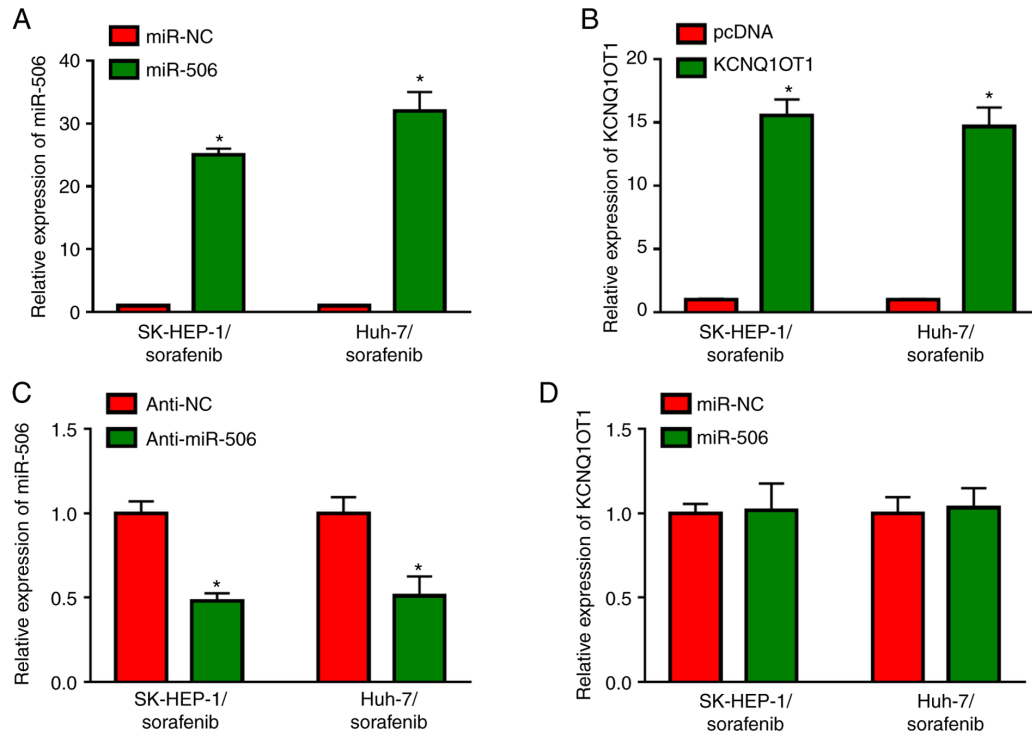

Supplement: Supplementary file 1 [file downloadSupplementary]
